# Supplementary material for: Understanding the stress field at the lateral termination of a thrust fold using generic geomechanical models and clustering methods
Source: Copernicus journal article supplement (doi:10.5194/se-15-1445-2024), 2024-12-09
Supplement: Supplementary file 1 [file se-15-1445-2024-supplement.zip]

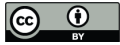

## *Supplement of*

# **Understanding the stress field at the lateral termination of a thrust fold using generic geomechanical models and clustering methods**

**Anthony Adwan et al.**

*Correspondence to:* Anthony Adwan ([anthony.adwan@irsn.fr](mailto:anthony.adwan@irsn.fr))

- [se-15-1445-2024-supplement-title-page.pdf](#)
- 3D\_examples\_polyfit
  - X1
    - \* [X1\\_example\\_sim11.html](#)
  - X2
    - \* [X2\\_example\\_sim5.html](#)
  - X3
    - \* [X3\\_example\\_sim2.html](#)
  - X4
    - \* [X4\\_example\\_sim181.html](#)

The copyright of individual parts of the supplement might differ from the article licence.
